# Supplementary material for: Design and synthesis of NiO nanoflakes/graphene nanocomposite as high performance electrodes of pseudocapacitor
Source: Royal Society of Chemistry journal article supplement (doi:10.1039/c3ra42091d), 2013-01-01
Supplement: c3ra42091d.pdf [file c3ra42091d.pdf]

**Design and Synthesis of NiO Nanoflakes/Graphene Nanocomposite as High performance Electrodes of Pseudocapacitor**

Yun-Guang Zhu<sup>a,b</sup>, Gao-Shao Cao<sup>a,\*</sup>, Cheng-Yue Sun<sup>a</sup>, Jian Xie<sup>a</sup>, Shuang-Yu Liu<sup>a</sup>,

Tie-Jun Zhu<sup>a</sup>, X.B. Zhao<sup>a</sup> and Hui Ying Yang<sup>b\*</sup>

*a. Department of Materials Science and Engineering, Zhejiang University, Hangzhou 310027, China*

*b. Pillar of Engineering Product Development, Singapore University of Technology and Design, 20 Dover Drive, Singapore 138682*

---

\* Corresponding author. Tel.: +86 571 8795 2181; fax: +86 571 8795 1451.  
E-mail address: [gscao@zjuem.zju.edu.cn](mailto:gscao@zjuem.zju.edu.cn) [yanghuiying@sutd.edu.sg](mailto:yanghuiying@sutd.edu.sg)

| Active material                               | Electrolyte | Rate ability                                           | Cycling performance                                        |
|-----------------------------------------------|-------------|--------------------------------------------------------|------------------------------------------------------------|
| NiO/graphene <sup>1</sup>                     | 6 M KOH     | 799 F/g (0.3 A/g)<br>460 F/g (5 A/g)                   | 90% at current of 0.6 A/g after<br>1000 cycles             |
| NiO flowers/ graphene <sup>2</sup>            | 2 M KOH     | 778.7 F/g (1.5 A/g)<br>120 F/g (3 A/g)                 | Nearly 100% at current of 1.5 A/g<br>after 500 cycles      |
| NiO with 3D structure <sup>3</sup>            | 2 M KOH     | 480 F/g (0.5 A/g)<br>252 F/g (5 A/g)                   |                                                            |
| Graphene/carbon sphere <sup>4</sup>           | 6 M KOH     | 198 F/g (0.175 A/g)                                    | More than 95% at current of<br>0.175 A/g after 1000 cycles |
| NiO/graphene with layer<br>by layer structure | 6 M KOH     | 274 F/g (1 A/g)<br>240 F/g (5 A/g)<br>220 F/g (10 A/g) | 100% at current of 5 A/g after<br>1500 cycles              |

**Table S1.** Comparison of some other reports about NiO or graphene or NiO/graphene composite as electrodes of supercapacitor.

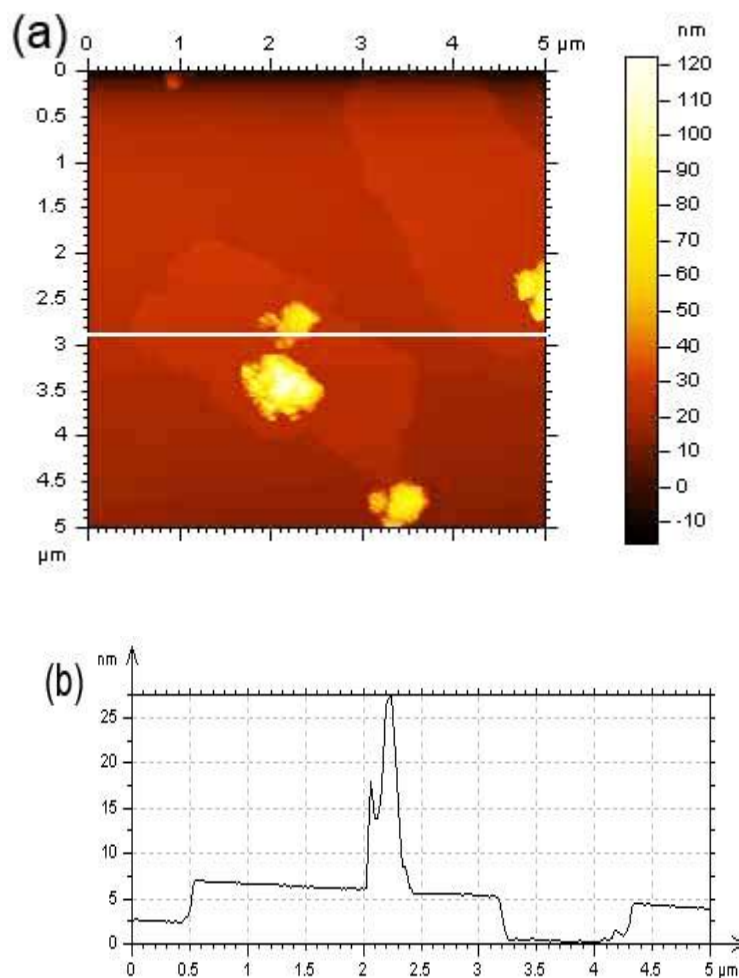

**Figure S1.** AFM image of NiO/G

AFM was conducted to further characterize NiO/G. The specimens were prepared by dropping well dispersed NiO/G suspension onto freshly cleaved mica. A typical AFM image of Figure S1 shows NiO nanoflakes anchored on the graphene. The cross-section contour shows that the height of the bare graphene is around 3 nm, which means the graphene is composed of several layers of sheet (below 10 layers). In comparison, the height of NiO nanoflakes is about 10–30 nm, which suggests that the NiO nanoflakes are partly overlapped on the graphene sheets.

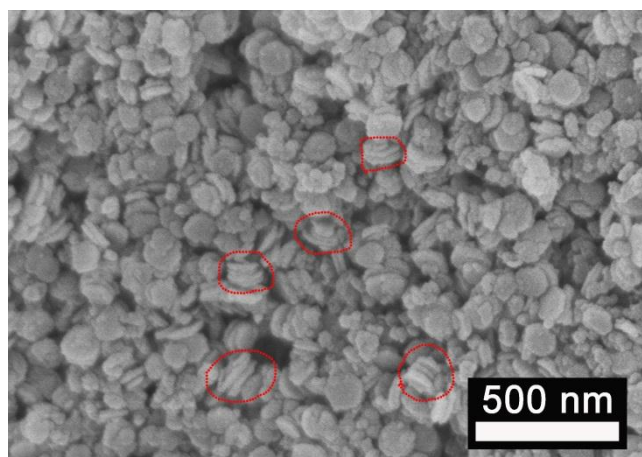

**Figure S2.** The SEM image of bare NiO nanoflakes.

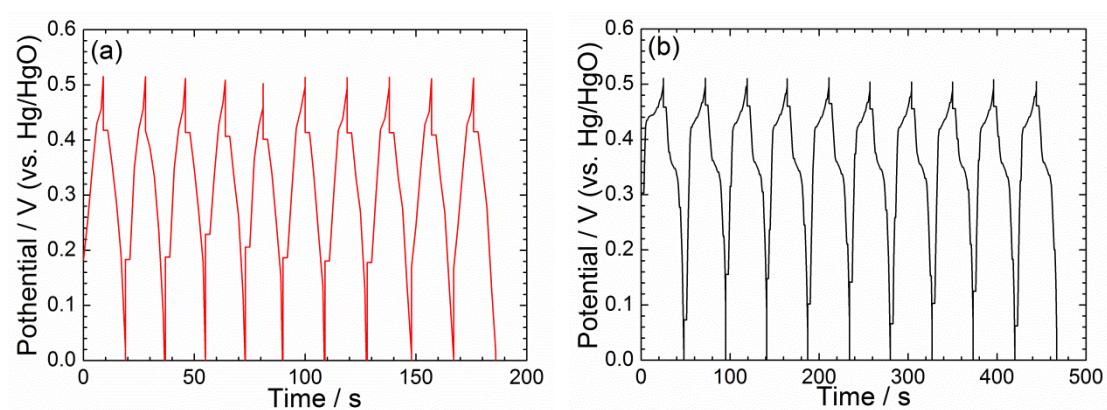

**Figure S3.** Galvanostatic charge/discharge curves of NiO (b) and NiO/G (c) at a current density of  $5 \text{ A g}^{-1}$  in 6 mol/L KOH aqueous solution.

## Reference

- 1 X. Su, H. Chai, D. Jia, S. Bao, W. Zhou and M. Zhou, *New Journal of Chemistry* 2013, **37** (2), 439-443.
- 2 C. Ge, Z. Hou, B. He, F. Zeng, J. Cao, Y. Liu and Y. Kuang, *J Sol-Gel Sci Technol* 2012, **63** (1), 146-152.
- 3 S.-I. Kim, J.-S. Lee, H.-J. Ahn, H.-K. Song and J.-H. Jang, *ACS Applied Materials & Interfaces* 2013, **5** (5), 1596-1603.
- 4 C. X. Guo and C. M. Li, *Energy & Environmental Science* 2011, **4** (11), 4504-4507.
